# Supplementary material
Source: PubMed Central journal article supplement (PMC2490770)
Supplement: M800855200_1.pdf [file M800855200_1.pdf]

## Supplemental Information

**Table 2**

Relative body weight of organs of *Wwox*-null mice compared to wild-type mice.

|                   | <b><u>Wild Type</u></b><br><b><u>gm (BW%)</u></b> | <b><u>Knockout</u></b><br><b><u>gm (BW%)</u></b> |
|-------------------|---------------------------------------------------|--------------------------------------------------|
| Spleen            | 0.058 (0.71%)                                     | 0.009 (0.28%)                                    |
| Thymus            | 0.068 (0.83%)                                     | 0.020 (0.63%)                                    |
| Liver             | 0.32 (3.9%)                                       | 0.11 (3.3%)                                      |
| Kidney            | 0.13 (1.6%)                                       | 0.044 (1.4%)                                     |
| Heart             | 0.060 (0.73%)                                     | 0.018 (0.57%)                                    |
| Brain             | 0.39 (4.8%)                                       | 0.35 (11.2%)                                     |
| Testis            | 0.025 (0.28%)                                     | 0.016 (0.28%)                                    |
| Adrenal           | 0.003 (0.036%)                                    | 0.002 (0.063%)                                   |
| Pan/Mes. Nodes    | 0.041 (0.50%)                                     | 0.016 (0.50%)                                    |
| Br Adipose Tissue | 0.18 (2.2%)                                       | 0.018 (0.57%)                                    |
| Pituitary         | 0.001 (0.012%)                                    | 0.001 (0.032%)                                   |

Both knockout mice and their wild-type littermates were killed at 3 weeks age. Autopsies were performed after CO<sub>2</sub> asphyxiation, mice and organs were weighed relative body weight were calculated; organ weight/whole body weight.

## Supplementary Information

**Table 3:**  
**Serum Chemistry levels in *Wwox*<sup>-/-</sup> mice**

| Parameter              | <u>KO</u> | <u>HET</u> | <u>WT</u> |
|------------------------|-----------|------------|-----------|
| BUN mmol/L             | 7.7       | 3.9        | 4.5       |
| Creatinine mmol/L      | 18        | 18         | 18        |
| Uric acid mmol/L       | 140       | 72         | 83        |
| Phosphorus mmol/L      | 5.84      | 3.79       | 3.93      |
| Calcium mmol/L         | 1.19      | 2.15       | 2.02      |
| Na mmol/L              | 36.1      | 141.2      | 142.2     |
| K mmol/L               | 27.29     | 10.67      | 11.08     |
| Cl mmol/L              | 40        | 106.2      | 106.3     |
| Mg mmol/L              | 0.66      | 1.05       | 1.1       |
| GGT U/L                | 12.1      | 0          | 0         |
| ALT (SGPT) U/L         | 16        | 19         | 20        |
| AST (SGOT) U/L         | 179       | 410        | 431       |
| AlkP U/L               | 131       | 882        | 929       |
| Lipase U/L             | 24.2      | 22.1       | 19.9      |
| Cholesterol mmol/L     | 1.5       | 4.2        | 4.6       |
| Triglyceride mmol/L    | 0.97      | 1.53       | 1.33      |
| Bilirubin–total mmol/L | 6         | 4.4        | 3.2       |
| Total protein g/L      | 22        | 46.3       | 45.5      |
| Albumin g/L            | 6.44      | 28.88      | 28.53     |
| Glucose mmol/L         | 2.87      | 8.16       | 8.29      |

Wild-type, heterozygous and homozygous littermate mice were sacrificed at 2-3 weeks of age. Autopsies were performed after CO<sub>2</sub> asphyxiation, blood was collected from renal vein from each genotype, pooled and serum analysis was carried out by Frimorfo Inc. (Fribourg, Switzerland). A representative analysis at 3 weeks of age is shown demonstrating a marked metabolic defect in KO mice compared to control littermates.

## Supplemental Information

Table 4. mRNA profiling in *Wwox*-deficient mice.

### Downregulated genes in *Wwox*-null mice

#### Functional Group 1 – Chromatin – Nucleosome assembly

|          |                                                      |                                                       |
|----------|------------------------------------------------------|-------------------------------------------------------|
| <b>1</b> | 1452540_a_at                                         | <a href="#">histone 1, H2bn</a>                       |
| <b>2</b> | 1421932_at<br>1421933_at<br>1421934_at<br>1450416_at | <a href="#">chromobox homolog 5 (Drosophila HP1a)</a> |
| <b>3</b> | 1422155_at<br>1452540_a_at<br>1460314_s_at           | <a href="#">histone 2, H2be</a>                       |
| <b>4</b> | 1460314_s_at                                         | <a href="#">histone 1, H3a</a>                        |
| <b>5</b> | 1422947_at<br>1422948_s_at<br>1428014_at             | <a href="#">histone 1, H4b</a>                        |
| <b>6</b> | 1452540_a_at                                         | <a href="#">histone 1, H2bg</a>                       |
| <b>7</b> | 1436596_at                                           | <a href="#">H2A histone family, member V</a>          |
| <b>8</b> | 1460314_s_at                                         | <a href="#">histone 1, H3a</a>                        |
| <b>9</b> | 1427762_x_at<br>1452540_a_at                         |                                                       |

#### Functional group 2 - Cell Cycle

|          |                                            |                                                                             |
|----------|--------------------------------------------|-----------------------------------------------------------------------------|
| <b>1</b> | 1452954_at                                 | <a href="#">ubiquitin-conjugating enzyme E2C</a>                            |
| <b>2</b> | 1456077_x_at                               | <a href="#">cell division cycle 25 homolog C (S. cerevisiae)</a>            |
| <b>3</b> | 1429658_a_at<br>1429659_at<br>1429660_s_at | <a href="#">SMC2 structural maintenance of chromosomes 2-like 1 (yeast)</a> |
| <b>4</b> | 1450920_at                                 | <a href="#">cyclin B2</a>                                                   |
| <b>5</b> | 1417910_at<br>1417911_at                   | <a href="#">cyclin A2</a>                                                   |

#### Unclustered genes

|          |                          |                                                                                                   |
|----------|--------------------------|---------------------------------------------------------------------------------------------------|
| <b>1</b> | 1423074_at<br>1423075_at | <a href="#">lectin, mannose-binding 2</a>                                                         |
| <b>2</b> | 1424278_a_at             | <a href="#">baculoviral IAP repeat-containing 5</a>                                               |
| <b>3</b> | 1422533_at               | <a href="#">A kinase (PRKA) anchor protein (yotiao) 9</a>                                         |
| <b>4</b> | 1418194_at               | <a href="#">UDP-N-acetyl-alpha-D-galactosamine: polypeptide N-acetylgalactosaminyltransferase</a> |

|           |                                          |                                                                                  |
|-----------|------------------------------------------|----------------------------------------------------------------------------------|
|           | 1418195_at                               |                                                                                  |
| <b>5</b>  | 1424128_x_at<br>1451246_s_at             | <a href="#">aurora kinase B</a>                                                  |
| <b>6</b>  | 1437187_at                               | <a href="#">E2F transcription factor 7</a>                                       |
| <b>7</b>  | 1432065_at                               | <a href="#">RIKEN cDNA 310003L13 gene</a>                                        |
| <b>8</b>  | 1449528_at                               | <a href="#">c-fos induced growth factor</a>                                      |
| <b>9</b>  | 1427410_at<br>1427411_s_at               | <a href="#">deleted in lymphocytic leukemia, 2</a>                               |
| <b>10</b> | 1433547_s_at                             | <a href="#">RIKEN cDNA 4921532K09 gene</a>                                       |
| <b>11</b> | 1430979_a_at                             | <a href="#">peroxiredoxin 2</a>                                                  |
| <b>12</b> | 1442051_at                               | <a href="#">gb:BE691662 /DB_XREF=gi:10079286 /DB_XREF=uv65a11.x1 /CLONE= ...</a> |
| <b>13</b> | 1452459_at                               | <a href="#">calmodulin binding protein 1</a>                                     |
| <b>14</b> | 1424629_at<br>1424630_a_at<br>1451417_at | <a href="#">breast cancer 1</a>                                                  |
| <b>15</b> | 1421890_at<br>1421891_at<br>1421892_at   | <a href="#">sialyltransferase 5</a>                                              |
| <b>16</b> | 1451611_at                               | <a href="#">HRAS like suppressor 3</a>                                           |
| <b>17</b> | 1451480_at                               | <a href="#">E2F transcription factor 4</a>                                       |
| <b>18</b> | 1431095_a_at<br>1438037_at<br>1453757_at | <a href="#">hect domain and RLD 5</a>                                            |
| <b>19</b> | 1422279_at                               | <a href="#">Friend virus susceptibility 1</a>                                    |

### **Upregulated genes in *Wwox*-null mice**

#### **Functional Group 1 – DNA packaging**

|          |                                          |                                                                 |
|----------|------------------------------------------|-----------------------------------------------------------------|
| <b>1</b> | 1441140_at                               | <a href="#">arginine glutamic acid dipeptide (RE) repeats</a>   |
| <b>2</b> | 1443952_at                               | <a href="#">nuclear receptor subfamily 1, group D, member 1</a> |
| <b>3</b> | 1420039_s_at<br>1433557_at<br>1449713_at | <a href="#">chromobox homolog 7</a>                             |

#### **Unclassified Genes**

|          |                          |                                                                            |
|----------|--------------------------|----------------------------------------------------------------------------|
| <b>1</b> | 1421916_at<br>1421917_at | <a href="#">platelet derived growth factor receptor, alpha polypeptide</a> |
| <b>2</b> | 1453294_at               | <a href="#">RIKEN cDNA 1700012B15 gene</a>                                 |

|           |                            |                                                                                                     |
|-----------|----------------------------|-----------------------------------------------------------------------------------------------------|
| <b>3</b>  | 1429235_at<br>1429236_at   | <a href="#">UDP-N-acetyl-alpha-D-galactosamine: polypeptide N-acetylgalactosaminyltransferase 2</a> |
| <b>4</b>  | 1418352_at                 | <a href="#">hydroxysteroid (17-beta) dehydrogenase 2</a>                                            |
| <b>5</b>  | 1437833_at<br>1456189_x_at | <a href="#">latent transforming growth factor beta binding protein 3</a>                            |
| <b>6</b>  | 1444018_at                 | <a href="#">RIKEN cDNA B930098A02 gene</a>                                                          |
| <b>7</b>  | 1427029_at                 | <a href="#">serine protease HETRA3</a>                                                              |
| <b>8</b>  | 1457337_at                 | <a href="#">RIKEN cDNA 2810434M15 gene</a>                                                          |
| <b>9</b>  | 1423062_at<br>1458268_s_at | <a href="#">insulin-like growth factor binding protein 3</a>                                        |
| <b>10</b> | 1443153_at                 | <a href="#">RIKEN cDNA 6030460N08 gene</a>                                                          |
| <b>11</b> | 1420106_at<br>1449733_s_at | <a href="#">seven in absentia 1A</a>                                                                |
| <b>12</b> | 1419039_at<br>1419040_at   | <a href="#">cytochrome P450, family 2, subfamily d, polypeptide 22</a>                              |
| <b>13</b> | 1449545_at                 | <a href="#">fibroblast growth factor 18</a>                                                         |
| <b>14</b> | 1441050_at                 | <a href="#">RIKEN cDNA 5730526G10 gene</a>                                                          |
| <b>15</b> | 1423460_at                 | <a href="#">PERQ amino acid rich, with GYF domain 1</a>                                             |

Using an Affymetrix microarray chip, the differential expression of mRNAs in the *Wwox*-deficient mice are compared to their wild type littermates. mRNAs extracted from spleen, kidney, brain, femur and calvarial bone were analyzed using mouse gene-chip 430 2.0 arrays. Genes were clustered according to their function by using Davide Ease 2.1 (Douglas A Hosack, Glynn Dennis Jr, Brad T Sherman, HClifford Lane, Richard A Lempicki. Identifying Biological Themes within Lists of Genes with EASE. [Genome Biology 2003 4\(6\):P4.](#)).
